# Supplementary material
Source: publisher figshare collection journal article supplement (https://karger.figshare.com/ndownloader/files/14392859)
Supplement: Supplementary file 1 [file 14392859]

"Supplementary Table S3. Percent errors between the current dataset and three sets of independent measurements of the same specimens: de Viet [2009], Todorov [2010] and Sherwood and colleagues [Sherwood et al., 2004; Barks et al., 2015]. Todorov�s [2010] whole brain measure excluded brainstem and thus are consistently smaller than our measurements. Brain source: PBB: Primate Brain Bank, Netherlands Institute of Neuroscience; GANP: Great Ape Neuroscience Project. For GANP scans the identifier is the studbook number, with alternative identifiers used in previous publications in brackets. Other abbreviations: NR: Not reported/available. ",,,,,,,,,,,,
,,,,,,,,,,,,
Species,Identifier,Brain source,Data source,Total brain volume,Telencephalon,Neocortical grey,Cerebellum,Hippocampus,Striatum,Thalamus,Diencephalon,
Aotus lemurinus griseimembra,PB0425,PBB,de Viet [2009],-3.3,NR,-8.2,4.2,NR,-1.5,NR,NR,
Callimico goeldii,PB0314,PBB,de Viet [2009],-3.0,NR,-5.1,2.2,NR,10.5,NR,NR,
Callithrix pygmaea,PB0206,PBB,de Viet [2009],-2.5,NR,-4.8,7.8,NR,9.8,NR,NR,
Leontopithecus rosalia,PB0740,PBB,de Viet [2009],-1.5,NR,-3.7,-1.8,NR,-5.2,NR,NR,
Saguinus midas,PB0316,PBB,de Viet [2009],-2.7,NR,-8.3,-1.3,NR,4.0,NR,NR,
Papio hamadryas,PB0116,PBB,de Viet [2009],-5.5,NR,1.0,-11.1,NR,1.9,NR,NR,
Gorilla gorilla gorilla,PB0111,PBB,de Viet [2009],1.0,NR,13.5,1.8,NR,NR,NR,NR,
Mean,,,,-2.5,,-2.2,0.2,,3.3,,,
Minimum,,,,-5.5,,-8.3,-11.1,,-5.2,,,
Maximum,,,,1.0,,13.5,7.8,,10.5,,,
Aotus lemurinus griseimembra,PB0425,PBB,Todorov [2010],6.2,3.6,-13.2,-7.7,NR,2.4,NR,39.6,
Aotus trivirgatus boliviensis,PB0306,PBB,Todorov [2010],3.8,1.2,-1.4,1.3,NR,-33.8,NR,25.1,
Callithrix penicillata,PB0513,PBB,Todorov [2010],1.3,0.3,-16.7,-4.2,NR,-44.2,NR,23.3,
Callithrix penicillata,PB0519,PBB,Todorov [2010],5.5,1.5,-16.4,-0.4,NR,-26.3,NR,14.1,
Callithrix pygmaea,PB0206,PBB,Todorov [2010],9.4,8.6,-5.7,4.3,NR,-26.6,NR,8.3,
Leontopithecus rosalia,PB0740,PBB,Todorov [2010],6.8,4.6,8.1,-5.1,NR,-32.6,NR,30.5,
Leontopithecus rosalia,PB0742,PBB,Todorov [2010],5.6,4.0,-10.8,-0.5,NR,-38.7,NR,16.1,
Saguinus midas,PB0316,PBB,Todorov [2010],3.2,0.1,-14.7,4.3,NR,-37.5,NR,15.9,
Saimiri boliviensis,PB0108,PBB,Todorov [2010],6.4,6.2,-2.7,1.4,NR,-0.7,NR,19.4,
Saimiri boliviensis,PB0719,PBB,Todorov [2010],1.9,0.9,-10.6,-0.2,NR,-11.6,NR,19.7,
Cercopithecus hamlyni,PB0811,PBB,Todorov [2010],4.6,2.4,-9.6,1.8,NR,-18.0,NR,45.9,
Colobus guereza,PB0113,PBB,Todorov [2010],3.6,-0.3,-7.8,1.0,NR,-25.0,NR,45.0,
Erythrocebus patas,PB0810,PBB,Todorov [2010],0.6,-0.8,-11.1,-0.4,NR,-36.8,NR,22.6,
Macaca nigra,PB0126,PBB,Todorov [2010],3.8,1.2,-8.8,4.5,NR,-1.9,NR,42.7,
Mandrillus sphinx,PB0710,PBB,Todorov [2010],8.9,0.0,-10.4,1.1,NR,NR,NR,NR,
Papio hamadryas,PB0116,PBB,Todorov [2010],3.7,2.6,-3.0,-2.1,NR,-16.6,NR,31.5,
Mean,,,,4.7,2.2,-8.4,-0.1,,-23.2,,26.6,
Minimum,,,,0.6,-0.8,-16.7,-7.7,,-44.2,,8.3,
Maximum,,,,9.4,8.6,8.1,4.5,,2.4,,45.9,
Gorilla gorilla gorilla,0062,GANP,Barks et al. [2015],1.2,NR,NR,-4.7,46.9,2.7,-18.1,NR,
Gorilla gorilla gorilla,0444,GANP,Barks et al. [2015],5.8,NR,NR,-3.1,41.2,2.9,-29.1,NR,
Pan troglodytes troglodytes,3859,GANP,Sherwood et al. [2004],4.3,NR,-4.6,1.5,20.0,-24.7,32.3,NR,
Pan troglodytes troglodytes,1870,GANP,Sherwood et al. [2004],1.9,NR,NR,6.2,NR,NR,NR,NR,
Pan troglodytes troglodytes,1032 (Hoboh),GANP,Sherwood et al. [2004],4.4,NR,-1.7,5.7,25.5,-23.2,9.7,NR,
Pongo pygmaeus,0844,GANP,Sherwood et al. [2004],2.7,NR,-6.4,8.3,45.5,-24.1,18.4,NR,
Mean,,,,3.4,,-4.3,2.3,35.8,-13.3,2.6,,
Minimum,,,,1.2,,-6.4,-4.7,20.0,-24.7,-29.1,,
Maximum,,,,5.8,,-1.7,8.3,46.9,2.9,32.3,,
